# Supplementary material for: RSV Risk Profile in Hospitalized Adults and Comparison with Influenza and COVID-19 Controls in Valladolid, Spain, 2010–2022
Source: PubMed Central journal article supplement — Infect Dis Ther. 2024 Jul 21;13(9):1983–99. doi: 10.1007/s40121-024-01021-1 (PMC11343947; doi:10.1007/s40121-024-01021-1), 2024-07-21
Supplement: 40121_2024_1021_MOESM1_ESM.pdf [file 40121_2024_1021_MOESM1_ESM.pdf]

## **SUPPLEMENTARY MATERIAL**

### **TITLE:**

**RSV risk profile in hospitalized adults and comparison with Influenza and COVID-19 controls in Valladolid–Spain, 2010–2022**

### **AUTHORS:**

Mariana Haeberer<sup>1</sup>, Martin Mengel<sup>2</sup>, Rong Fan<sup>1</sup>, Marina Toquero-Asensio<sup>3,4</sup>, Alejandro Martin-Toribio<sup>3</sup>, Qing Liu<sup>1</sup>, Yongzheng He<sup>1</sup>, Sonal Uppal<sup>1</sup>, Silvia Rojo-Rello<sup>3,5</sup>, Marta Domínguez-Gil<sup>3,5</sup>, Cristina Hernán-García<sup>3,5</sup>, Virginia Fernández-Espinilla<sup>3,5</sup>, Caihua Liang<sup>1</sup>, Elizabeth Begier<sup>1</sup>, Javier Castrodeza Sanz<sup>3,5</sup>, José M. Eiros<sup>3,5</sup>, Ivan Sanz-Muñoz<sup>4</sup>

### **AFFILIATIONS:**

<sup>1</sup>Pfizer SLU/Inc, Spain/United States

<sup>2</sup>Independent consultant

<sup>3</sup>National Influenza Centre, Valladolid, Spain

<sup>4</sup>Instituto de Estudios de Ciencias de la Salud de Castilla y León, ICSCYL, Soria, Spain

<sup>5</sup>Hospital Clínico Universitario de Valladolid, Spain

### **CORRESPONDENCE DETAILS:**

Mariana Haeberer

Email address: mariana.haeberer@pfizer.com

Phone number: +34 644272199

Corresponding address: Av Europa 20B, 28108, Madrid, Spain

**Supplementary Table 1. Distribution of Respiratory Syncytial Virus (RSV) subtype by calendar year. Valladolid-Spain, 2010–2022**

| Calendar year | Subtype A  | Subtype B  |
|---------------|------------|------------|
| 2017          | 1 (100%)   | 0 (0.0%)   |
| 2018          | 2 (100%)   | 0 (0.0%)   |
| 2019          | 13 (59.1%) | 9 (40.9%)  |
| 2020          | 30 (75.0%) | 10 (25.0%) |
| 2021          | 3 (21.4%)  | 11 (78.6%) |
| 2022          | 7 (36.8%)  | 12 (63.2%) |

Note: 2010–2016 no subtype identified.

**Supplementary Table 2. Pulmonary infiltrates type among RSV patients (N=287). Valladolid-Spain, 2010–2022**

| Pulmonary infiltrates type |                     |                |     |
|----------------------------|---------------------|----------------|-----|
| <b>Alveolar</b>            | <b>Interstitial</b> | <b>Unknown</b> |     |
| 44 (29.3%)                 | 106 (70.7%)         |                | 137 |
| <b>Diffuse</b>             | <b>Focal</b>        | <b>Unknown</b> |     |
| 42 (44.2%)                 | 53 (55.8%)          |                | 192 |
| <b>Bilateral</b>           | <b>Unilateral</b>   | <b>Unknown</b> |     |
| 112 (48.3%)                | 120 (51.7%)         |                | 55  |

**Supplementary Table 3. Antibiotic treatment by coinfection RSV and bacteria. Valladolid-Spain, 2010–2022**

|                             | Coinfection RSV and bacteria |     | P-value |
|-----------------------------|------------------------------|-----|---------|
|                             | Yes                          | No  |         |
| <b>Antibiotic treatment</b> |                              |     | <.0001  |
| Yes                         | 108                          | 304 |         |
| No                          | 16                           | 207 |         |

**Supplementary Table 4. At least one severe outcome by RSV subgroup. Valladolid-Spain, 2010–2022**

| RSV subgroup | At least one severe outcome |    | P-value |
|--------------|-----------------------------|----|---------|
|              | Yes                         | No |         |
| <b>A</b>     | 27                          | 27 | 0.2281  |
| <b>B</b>     | 15                          | 25 |         |
